# Supplementary material for: Gut dysbiosis contributes to amyloid pathology, associated with C/EBPβ/AEP signaling activation in Alzheimer’s disease mouse model
Source: PubMed Central journal article supplement — Sci Adv. 2020 Jul 29;6(31):eaba0466. doi: 10.1126/sciadv.aba0466 (PMC7439296; doi:10.1126/sciadv.aba0466), 2020-07-29
Supplement: aba0466_SM.pdf [file aba0466_SM.pdf]

## Supplementary Materials for

### **Gut dysbiosis contributes to amyloid pathology, associated with C/EBP $\beta$ /AEP signaling activation in Alzheimer's disease mouse model**

Chun Chen, Eun Hee Ahn, Seong Su Kang, Xia Liu, Ashfaquul Alam\*, Keqiang Ye\*

\*Corresponding author. Email: [kye@emory.edu](mailto:kye@emory.edu) (K.Y.); [m.ashfaquul.alam@uky.edu](mailto:m.ashfaquul.alam@uky.edu) (A.A.)

Published 29 July 2020, *Sci. Adv.* **6**, eaba0466 (2020)  
DOI: 10.1126/sciadv.aba0466

#### **This PDF file includes:**

Figs. S1 to S7

# Supplementary Figures

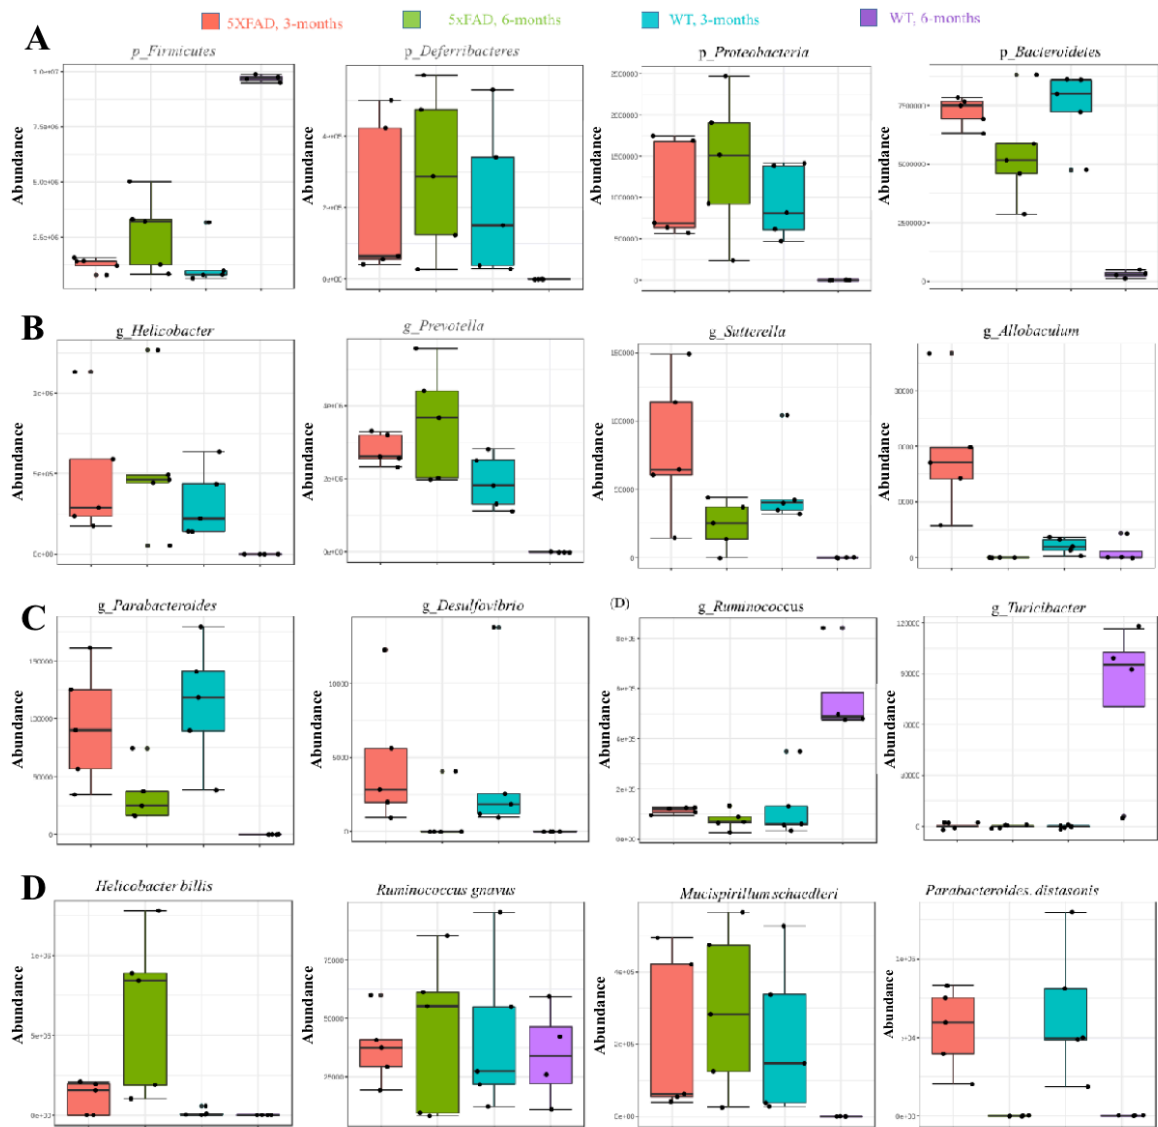

**Supplementary Figure 1. 5xFAD mice are associated with temporal alterations in gut microbiome composition.**

(A-D) Age-dependent disequilibrium in the taxonomic composition of the gut microbiome in 5XFAD. Boxplot showing mean abundance of bacterial phyla and genera determined by high-throughput sequencing analysis (n = 5).

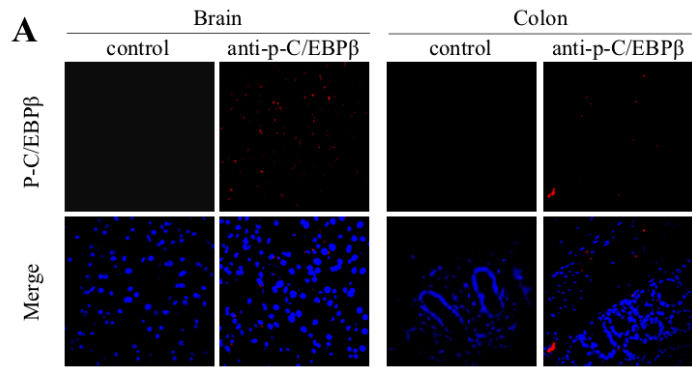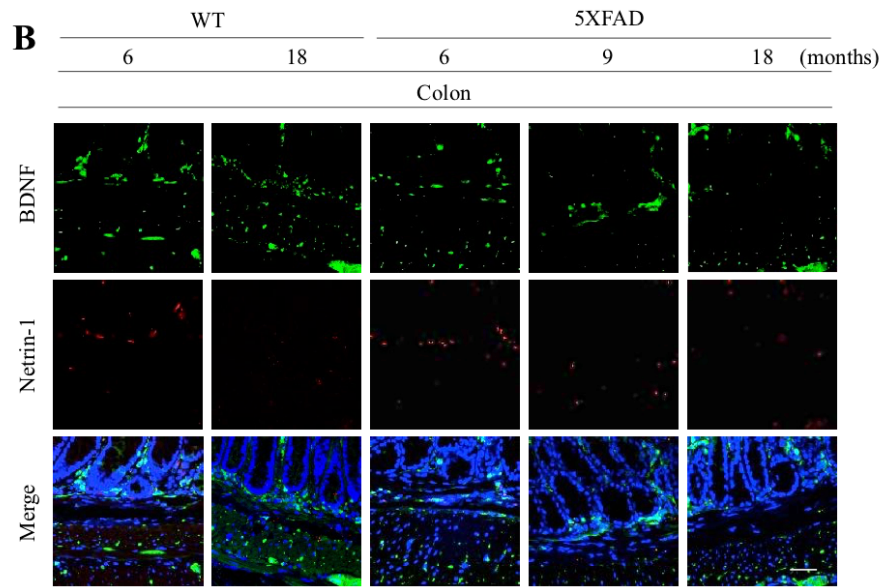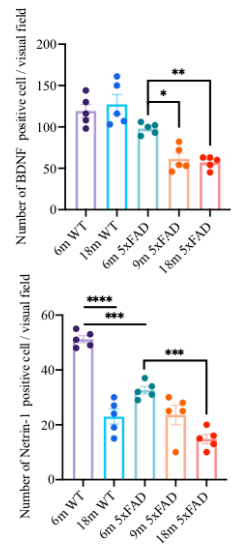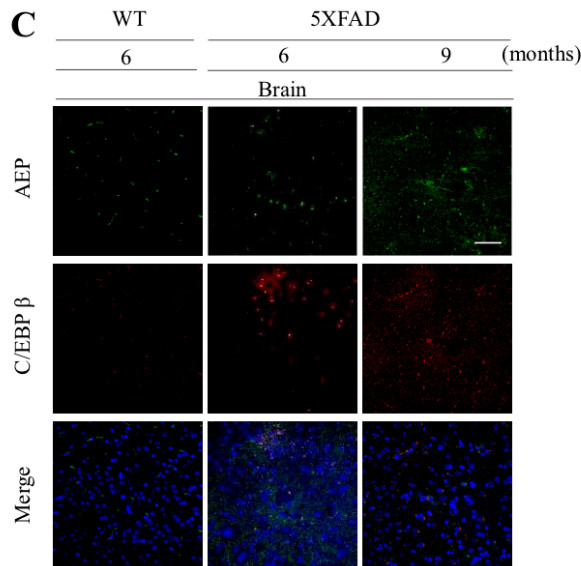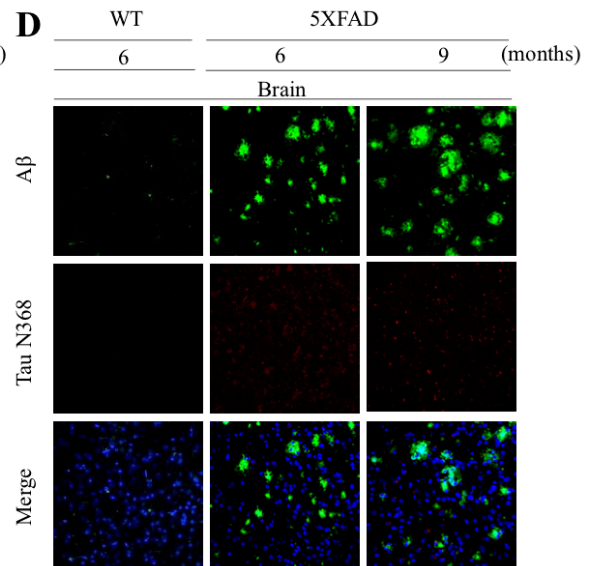

**Supplementary Figure 2. C/EBP $\beta$ /AEP pathway is escalated in an age-dependent way in 5xFAD mice brain.**

(A) Validation of the specific staining of p-CEBP/ $\beta$  antibody in both the brain and the colon sections. Immunofluorescent staining of BDNF and Netrin-1 (B) in the colon of 5xFAD mice and the quantification are included right panels, C/EBP $\beta$  and AEP (C), A $\beta$  and cleaved Tau N368 (D) in the brain of 5xFAD mice. Scale bar: 20  $\mu$ m.

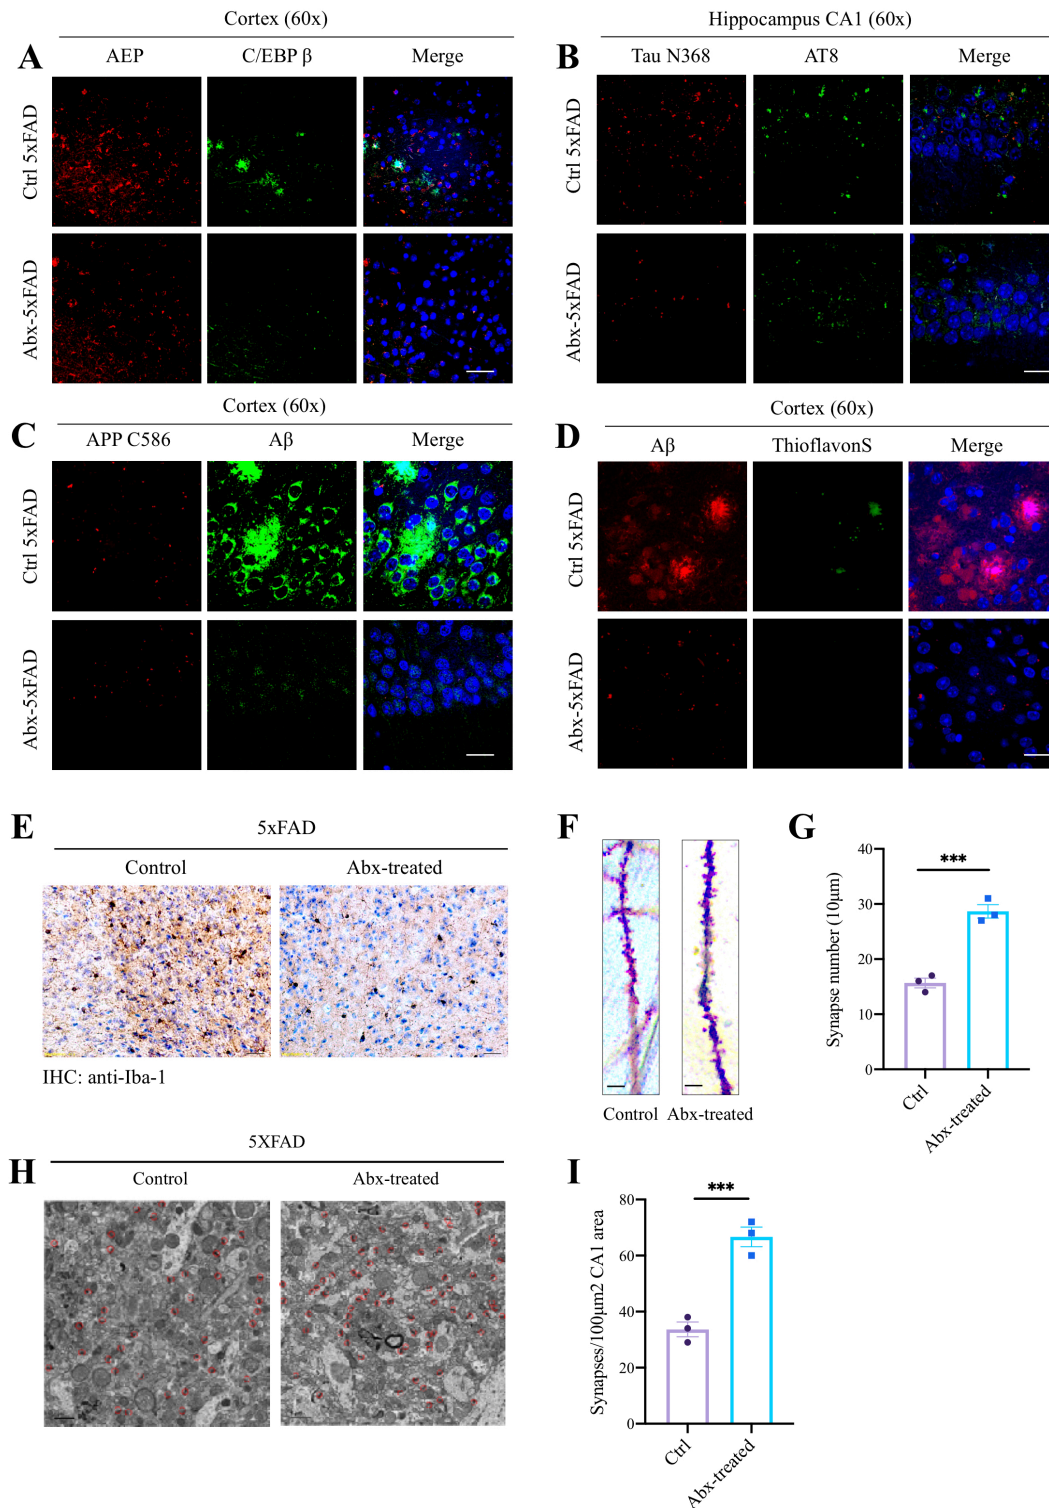

**Supplementary Figure 3. Antibiotic treatment represses C/EBP $\beta$ /AEP signaling and prevents the synaptic loss in hippocampal CA1 area of 5XFAD mice.**

Immunofluorescent staining of AEP and C/EBP $\beta$  (A), AT8 and cleaved Tau N368 (B), cleaved APP C586 and A $\beta$  (C), A $\beta$  and Thioflavin S co-staining (D) in the brains of 5xFAD mice. Scale bar: 40  $\mu$ m. (E) Immunohistochemistry Staining of Iba-1 in the brains of 5xFAD mice. Scale bar: 50  $\mu$ m. (F) The dendritic spines from the apical dendritic layer of the cerebral cortex region were analyzed by Golgi staining. (Scale bar: 5  $\mu$ m). (G) Quantitative analysis of the spine density. The decreased spine densities in 5xFAD mice were reversed by ABX treatment. (n=3 in each group, Data are shown as mean  $\pm$  SEM. \*\*\*P < 0.001). (H) Representative electron microscopy of the synaptic structures. Red circles indicate the synapses. (Scale bar: 1  $\mu$ m). (I) Quantitative analysis of the synaptic densities in vehicle and ABX-treated 5xFAD mice. 5xFAD mice showed decreased synaptic densities, which was alleviated by ABX treatment. (n=3 in each group, Data are shown as mean  $\pm$  SEM. \*\*\*P < 0.001).

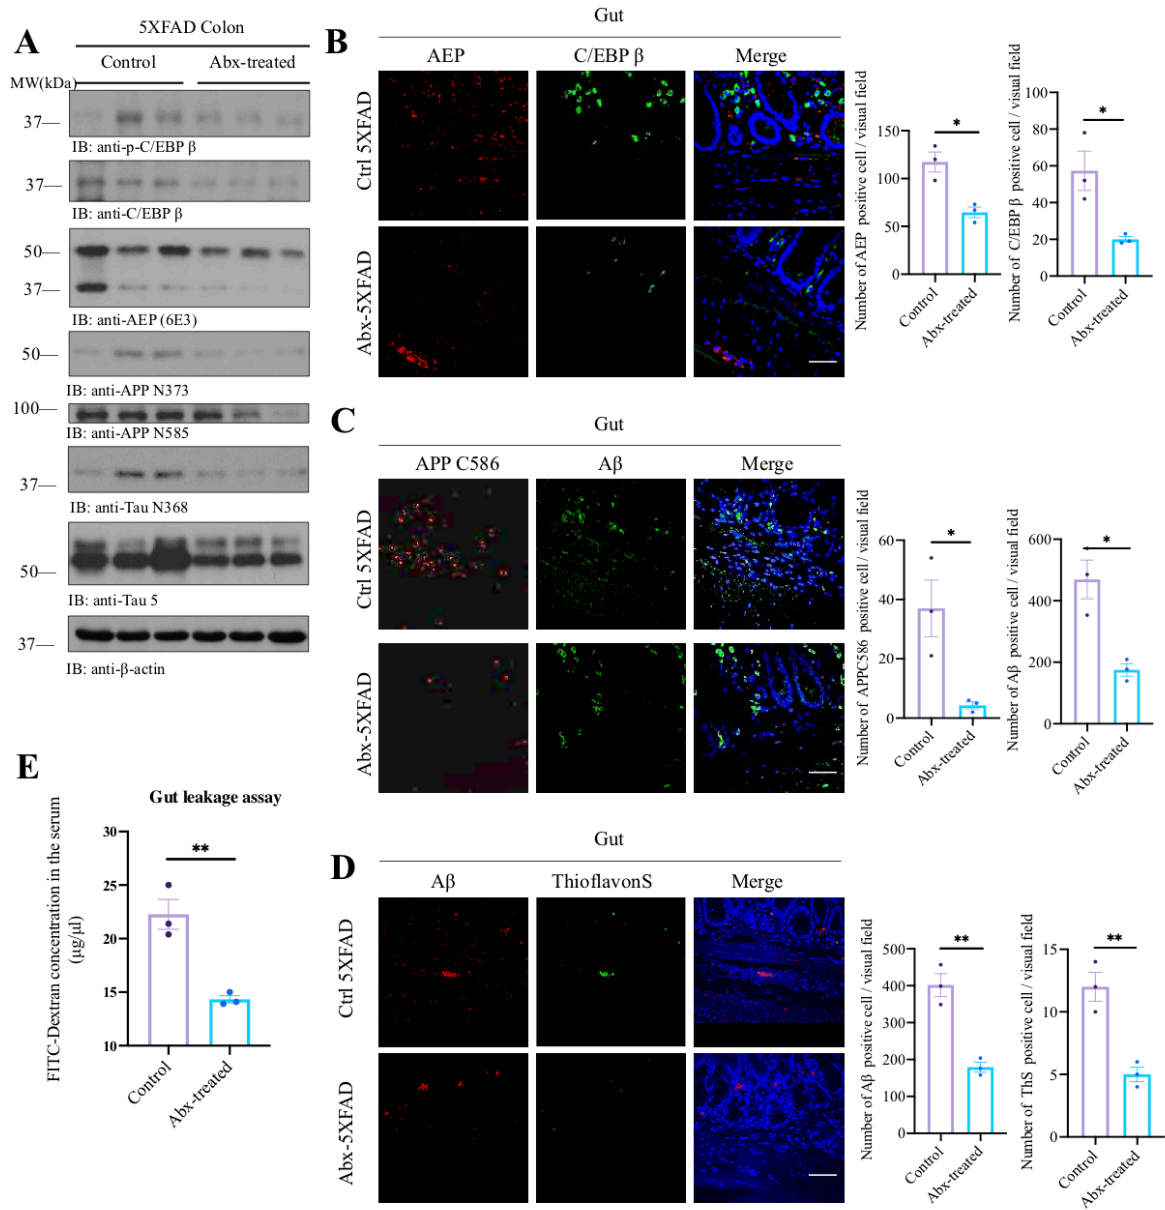



**Supplementary Figure 4. Antibiotic treatment represses C/EBP  $\beta$ /AEP signaling in the colon of 5XFAD mice.**

(A) Immunoblot showing p-C/EBP $\beta$ , C/EBP $\beta$ , AEP, APP, and Tau expression and processing in the mouse brains. (B-D) Immunofluorescent staining of AEP and C/EBP $\beta$ , cleaved APP C586 and A $\beta$ , A $\beta$  and Thioflavin S co-staining in the brains of 5x FAD mice. Scale bar: 20  $\mu$ m. (E) Gastrointestinal permeability barrier defect as determined by FITC-dextran translocation in ABX-treated 5x FAD mice and control mice. Data represent the mean  $\pm$  SEM; representative data of three samples; \*\*P < 0.01 compared with control, one-way ANOVA.

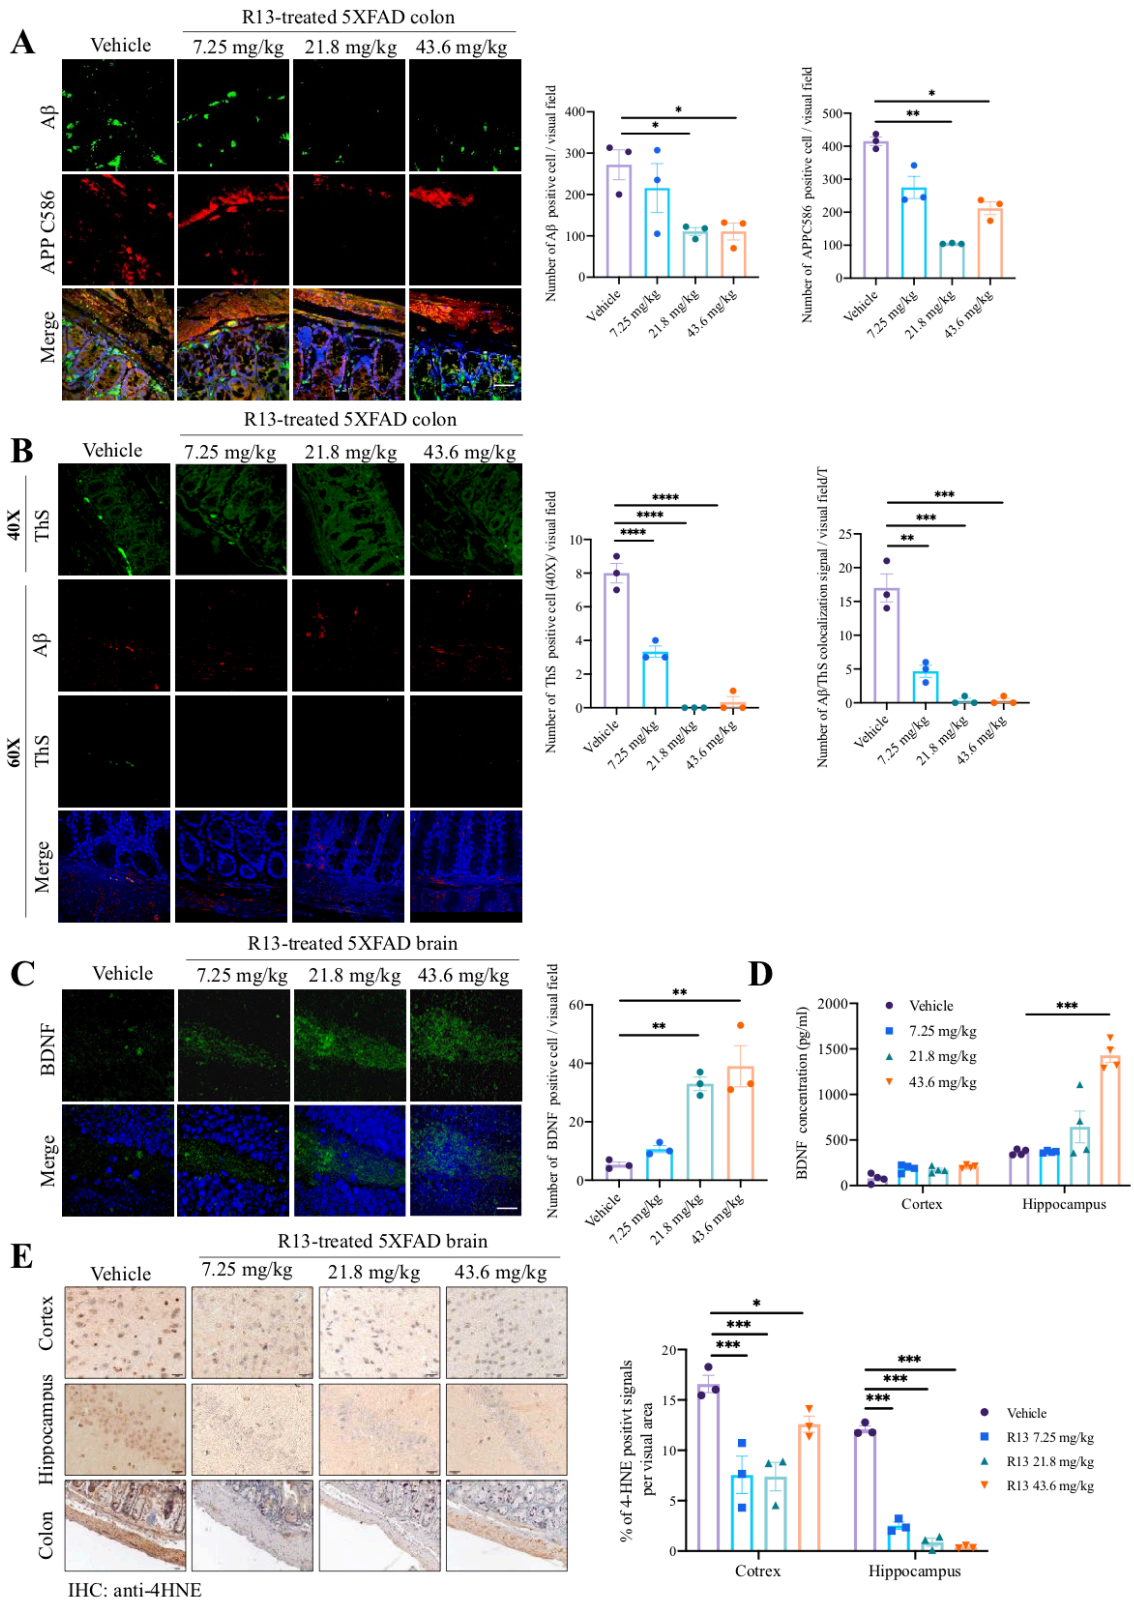

**Supplementary Figure 5. R13 decreases AD pathology, alleviates oxidative stress and increases brain BDNF concentrations in 5xFAD mice.**

(A) Immunofluorescent staining of cleaved APP C586 and A $\beta$ , (B) Immunofluorescent staining A $\beta$  and Thioflavin S co-staining (B) in the gut sections, and BDNF (C) in the brain sections of 5xFAD mice treated with vehicle or different doses of R13. Scale bar: 20  $\mu$ m (D) R13 treatment increased BDNF concentrations in the hippocampus. Data represent the mean  $\pm$  SEM; representative data of four samples; \*\*\*P < 0.001 compared with vehicle, one-way ANOVA. (E) Oxidative stress evaluated by 4-hydroxynonenal (4-HNE) staining was selectively down-regulated in the R13-treated brains and gut of 5xFAD mice. Quantitative analysis of the 4-HNE positive signals per visual area. The increased 4-HNE in the brains of 5XFAD mice was mitigated by R13 treatment in a dose-dependent manner. (n=3 in each group, \*P < 0.05, \*\*\*P < 0.001).

**A**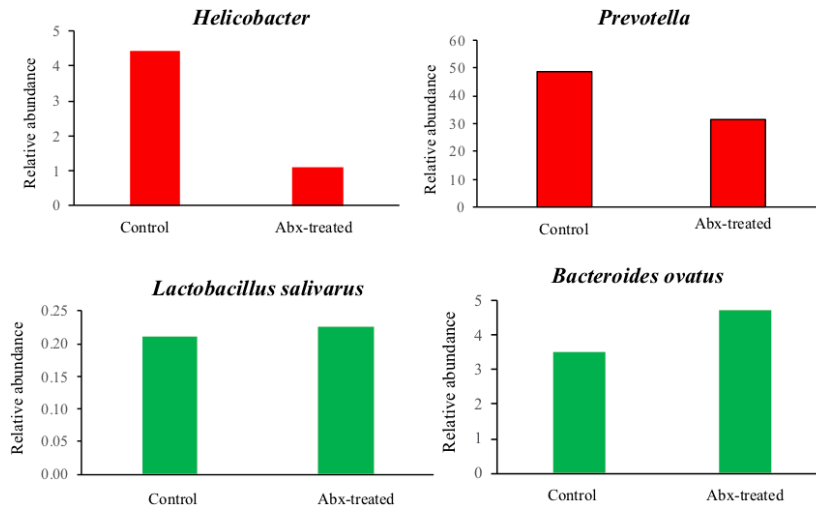**B**

5XFAD control 5XFAD boiled LS 5XFAD live LS

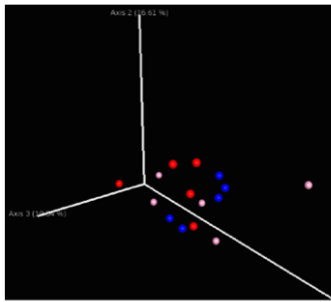**C**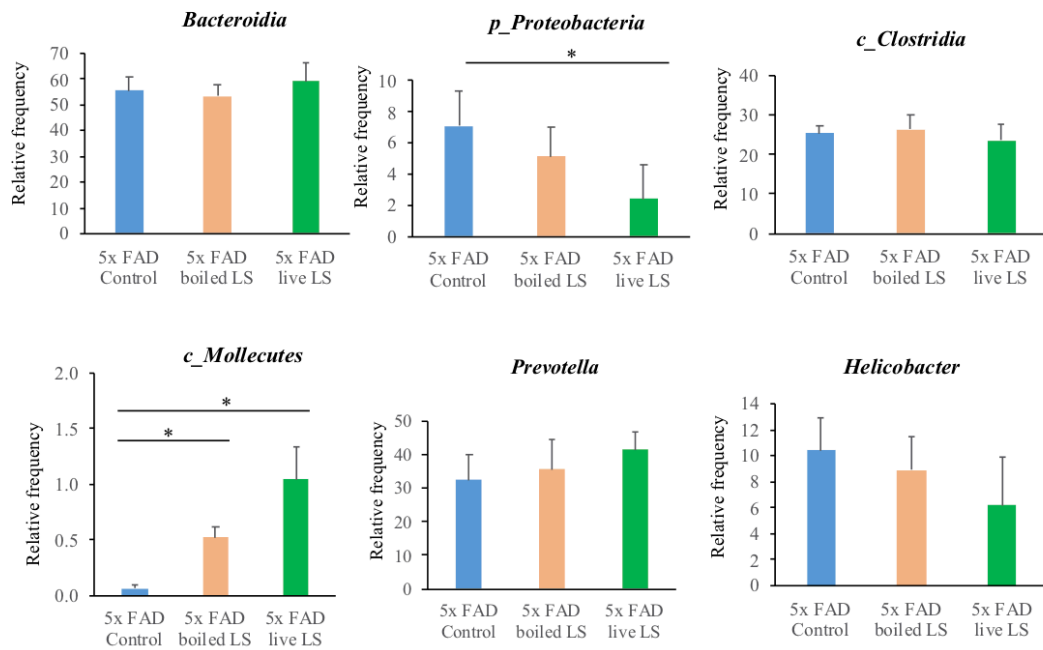

**Supplementary Figure 6. Gut microbiota analysis by 16S rRNA from the fecal samples of 5xFAD mice, chronically treated antibiotics or probiotics.**

Relative abundance of bacterial phyla determined by high-throughput sequencing analysis (n = 6). (A) Mean bacteria abundance of bacterial genus and species in stool samples from *ABX-treated* and control 5xFAD mice. (B) PCoA plot of microbiota community structure in vehicle and live *Lactobacillus salivarius* treated, boiled *Lactobacillus salivarius* treated and control 5xFAD mice. (C) Mean bacteria abundance of bacterial phylum, genus and class in stool samples from and live *Lactobacillus salivarius* treated, boiled *Lactobacillus salivarius* treated and control 5xFAD mice. Data represent the mean  $\pm$  SEM; representative data five samples; \*P < 0.05 compared with control, one-way ANOVA.

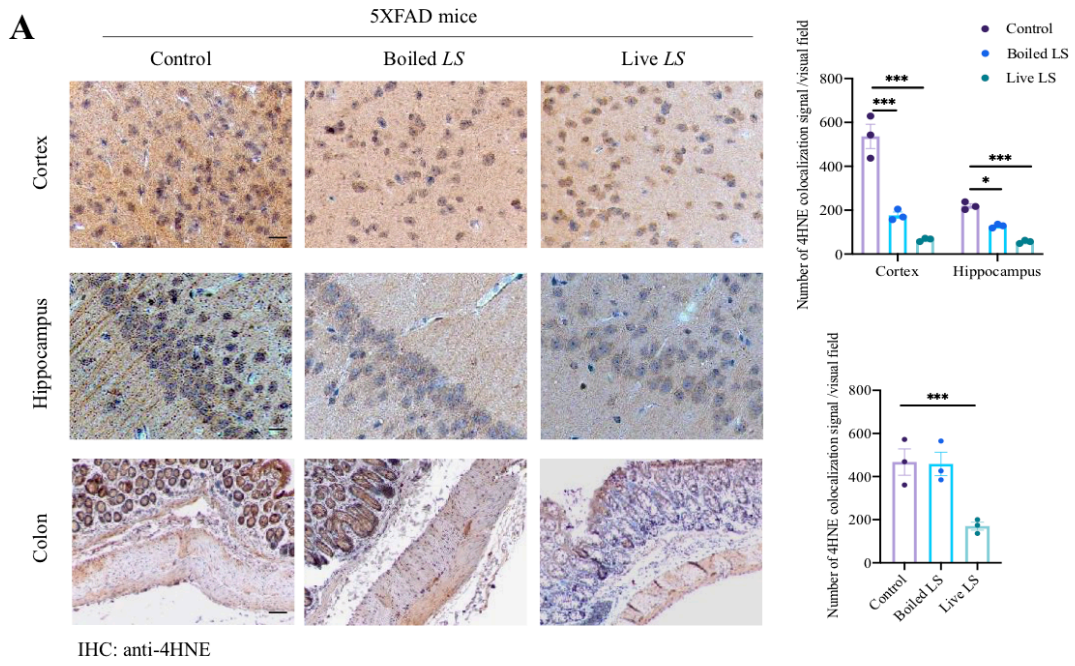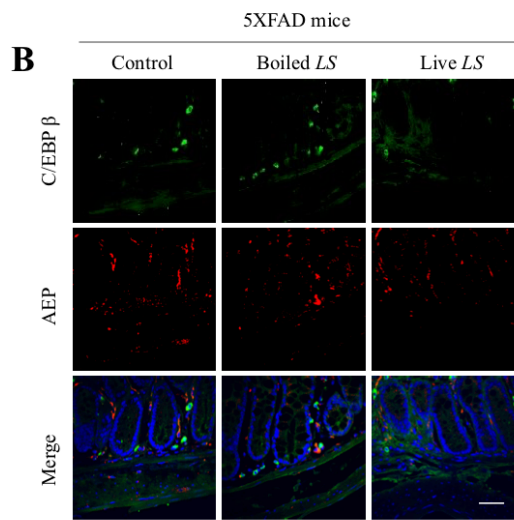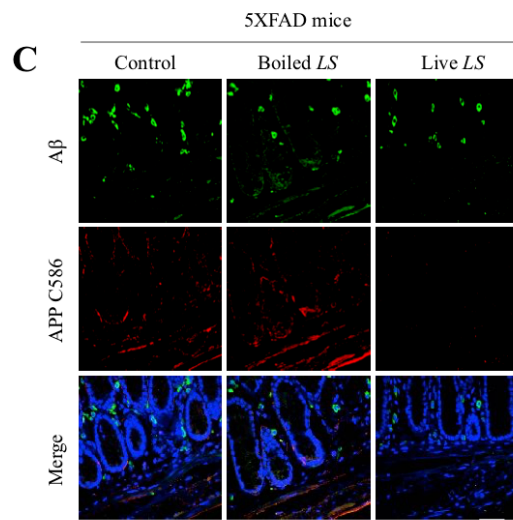

**Supplementary Figure 7. R13-induced probiotic *Lactobacillus salivarius* alleviates oxidative stress in both the brain and colon of 5xFAD mice and decreases C/EBP $\beta$ /AEP in 5xFAD mice colon.**

(A) Oxidative stress evaluated by 4-hydroxynonenal (4-HNE) staining was selectively reduced in live *Lactobacillus salivarius*-treated brains and gut of 5xFAD mice. Quantitative analysis of the 4-HNE positive signals per visual area. The increased 4-HNE in the brains of 5XFAD mice was reversed by probiotic treatment. (n=3 in each group, \*P < 0.05, \*\*\*P < 0.001). Scale bar: 100  $\mu$ m. (B-C) Immunofluorescent staining of C/EBP $\beta$  and AEP (B), cleaved APP C586 and A $\beta$  (C) in the gut sections of 5xFAD mice. Scale bar: 20  $\mu$ m
